# Supplementary material for: Low Ca2+ concentration doping enhances the mechanical properties and ionic conductivity of Na3PS4 superionic conductors based on first-principles
Source: Royal Society of Chemistry journal article supplement (doi:10.1039/d0cp03487h), 2020-01-01
Supplement: d0cp03487h1.pdf [file d0cp03487h1.pdf]

**Supporting Information for:**

**Low Ca<sup>2+</sup> concentration doping enhances the mechanical properties and ionic conductivity of Na<sub>3</sub>PS<sub>4</sub> superionic conductors based on first-principles**

**Bowen Huang,<sup>a</sup> Junbo Zhang,<sup>b</sup> Yutao Shi,<sup>b</sup> Xiaodong Lu,<sup>b</sup> Jingjing Zhang,<sup>b</sup> Bingbing Chen,<sup>b,\*</sup> Jianqiu Zhou<sup>a, b, \*</sup> and Rui Cai<sup>c</sup>.**

<sup>a</sup> Department of Mechanical and Power Engineering, Nanjing Tech University, Nanjing, 210009, Jiangsu Province, China

<sup>b</sup> Department of Energy Science and Engineering, Nanjing Tech University, Nanjing, 210000, Jiangsu Province, China

<sup>c</sup> State Key Laboratory of Materials-Oriented Chemical Engineering, Nanjing Tech University, Nanjing, 210009, Jiangsu Province, China

\*Corresponding author

---

## Elastic parameters calculation methods

Based on the first-principles calculation of density function theory (DFT), the polymorphic modulus can be approximated by Voigt method and Reuss method. The approximate relationship between  $G_V$ ,  $G_R$ ,  $B_V$  and  $B_R$  is obtained according to Voigt and Reuss:

$$\begin{aligned} G_V &= \frac{1}{15} [(C_{11} + C_{22} + C_{33} - C_{12} - C_{13} - C_{23}) + 3(C_{44} + C_{55} + C_{66})] \\ G_R &= 15 \left[ \frac{1}{4(S_{11} + S_{22} + S_{33}) - 4(S_{12} + S_{13} + S_{23}) + 3(S_{44} + S_{55} + S_{66})} \right] \\ B_V &= \frac{(C_{11} + C_{22} + C_{33}) + 2(C_{12} + C_{13} + C_{23})}{9} \\ B_R &= \frac{1}{(S_{11} + S_{22} + S_{33}) + 2(S_{12} + S_{13} + S_{23})} \end{aligned} \quad (1)$$

Where  $C_{ij}$  and  $S_{ij}$  represent the elastic stiffness constant and the elastic compliance constant, respectively, collectively referred to as the elastic constant, which determines the stiffness of the crystal against external strain. According to the theory of elasticity, a  $6 \times 6$  symmetric matrix is needed to describe the relationship between stress and strain. Both the c-phase and the t-phase of  $\text{Na}_3\text{PS}_4$  have symmetry, Therefore, the independent constants of the two phases are reduced to nine:  $C_{11}$ ,  $C_{22}$ ,  $C_{33}$ ,  $C_{44}$ ,  $C_{55}$ ,  $C_{66}$ ,  $C_{12}$ ,  $C_{13}$ ,  $C_{23}$  respectively.

The calculation relation of shear modulus ( $G$ ) and bulk modulus ( $B$ ) is derived by Voigt-Reuss-Hill (VRH) averaging method, as follows:

$$\begin{aligned} G &= \frac{G_R + G_V}{2} \\ B &= \frac{B_R + B_V}{2} \end{aligned} \quad (2)$$

Where  $G_V$  and  $G_R$  are the shear moduli of Voigt and Reuss, respectively, and  $B_V$  and  $B_R$  are the bulk moduli of Voigt and Reuss, respectively.

Young's modulus ( $E$ ) and Poisson's ratio ( $\nu$ ) can be calculated by the following equation.

$$\begin{aligned} E &= \frac{9BG}{3B + G} \\ \nu &= \frac{3B - 2G}{6B + 2G} \end{aligned} \quad (3)$$

Criteria for evaluating the stability of elastic constants.

$$\begin{aligned}
C_{ij} (i = j) &> 0 \\
C_{11} + C_{22} - 2C_{12} &> 0 \\
C_{11} + C_{33} - 2C_{13} &> 0 \\
C_{22} + C_{33} - 2C_{23} &> 0 \\
C_{11} + C_{22} + C_{33} + 2C_{12} + 2C_{13} + 2C_{23} &> 0
\end{aligned}
\tag{4}$$

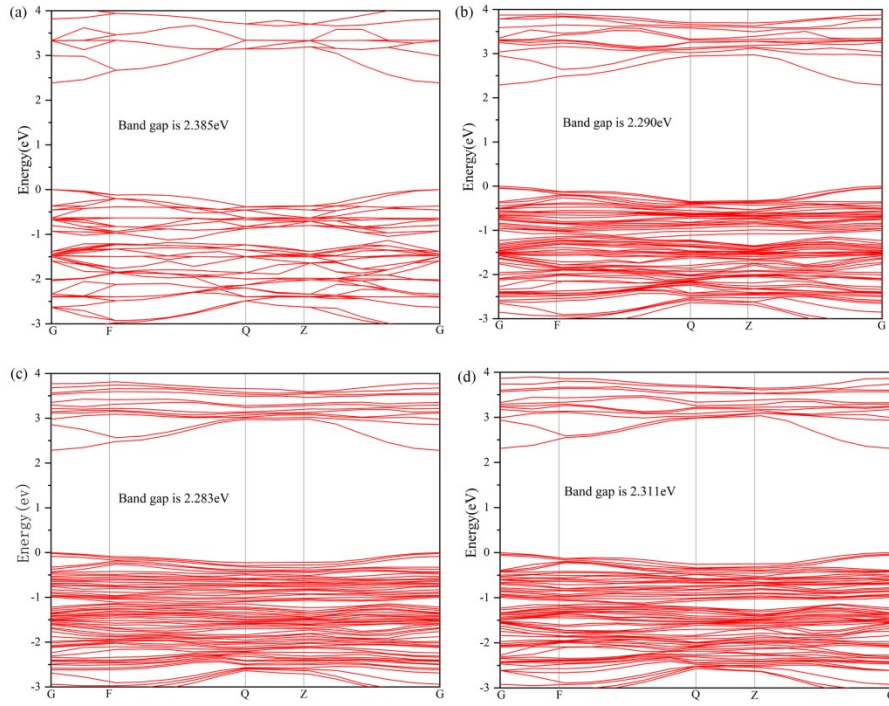

**Figure S1.** The band gap structure of cubic  $\text{Na}_3\text{PS}_4$ . (a) The band gap structure of  $\text{Na}_3\text{PS}_4$ . (b) The band gap structure of  $\text{Ca}_{0.125}\text{Na}_{2.75}\text{PS}_4$ . (c) The band gap structure of  $\text{Ca}_{0.25}\text{Na}_{2.5}\text{PS}_4$ . (d) The band gap structure of  $\text{Ca}_{0.375}\text{Na}_{2.25}\text{PS}_4$ .

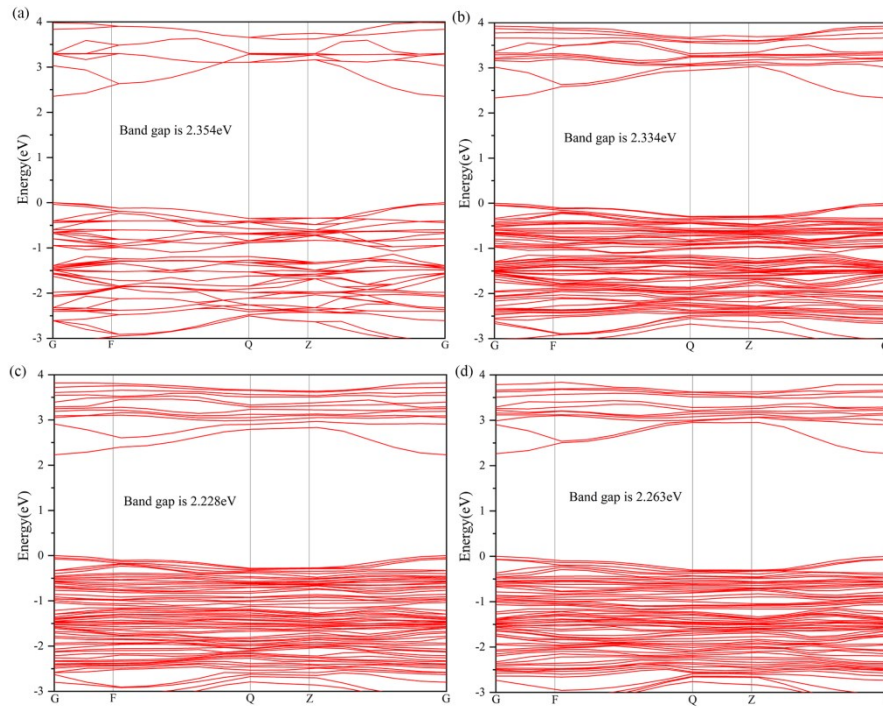

**Figure S2.** The band gap structure of tetragonal Na<sub>3</sub>PS<sub>4</sub>. (a) The band gap structure of Na<sub>3</sub>PS<sub>4</sub>. (b) The band gap structure of Ca<sub>0.125</sub>Na<sub>2.75</sub>PS<sub>4</sub>. (c) The band gap structure of Ca<sub>0.25</sub>Na<sub>2.5</sub>PS<sub>4</sub>. (d) The band gap structure of Ca<sub>0.375</sub>Na<sub>2.25</sub>PS<sub>4</sub>.

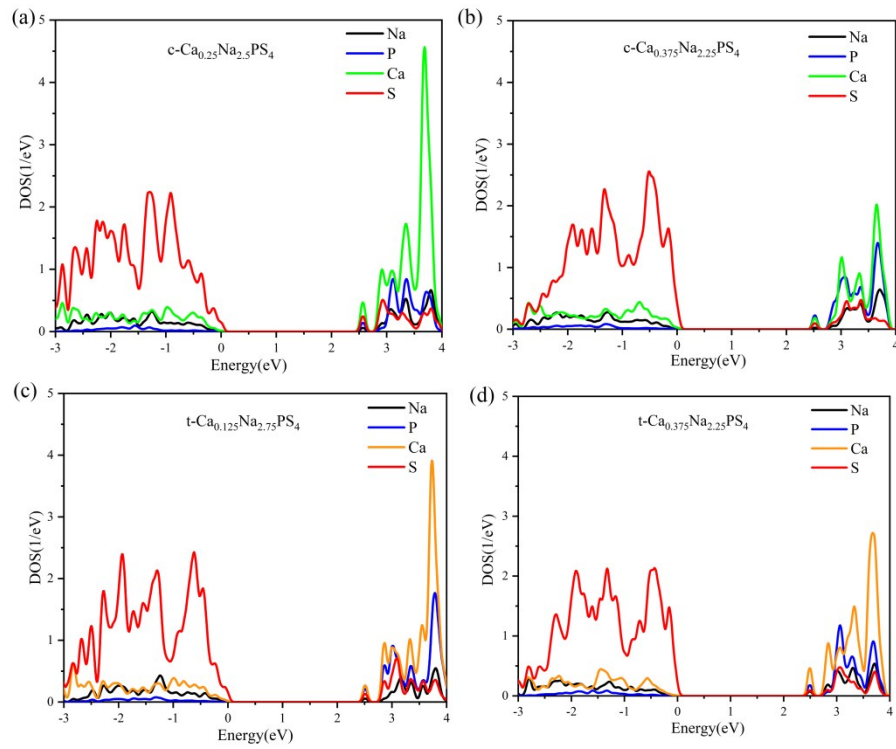

**Figure S3.** Projected DOS of cubic and tetragonal  $\text{Na}_3\text{PS}_4$ . (a) Projected DOS of  $c\text{-Ca}_{0.25}\text{Na}_{2.5}\text{PS}_4$ . (b) Projected DOS of  $c\text{-Ca}_{0.375}\text{Na}_{2.25}\text{PS}_4$ . (c) Projected DOS of  $t\text{-Ca}_{0.125}\text{Na}_{2.75}\text{PS}_4$ . (d) Projected DOS of  $t\text{-Ca}_{0.375}\text{Na}_{2.25}\text{PS}_4$ .

**Table S1.** Calculation of formation energies of Ca and Na vacancies with different concentrations at different sites.

| Composition                                               | Ca <sup>2+</sup> doped site | Na vacancy site | Formation energy(eV) |
|-----------------------------------------------------------|-----------------------------|-----------------|----------------------|
| c-Ca <sub>0.125</sub> Na <sub>2.75</sub> PS <sub>4</sub>  | Na I                        | Na I            | 0.348                |
|                                                           | Na I                        | Na II           | 0.627                |
|                                                           | Na II                       | Na I            | 0.248                |
|                                                           | Na II                       | Na II           | 0.347                |
| c- Ca <sub>0.25</sub> Na <sub>2.5</sub> PS <sub>4</sub>   | Na I, Na I                  | Na I, Na I      | 0.758                |
|                                                           | Na I, Na I                  | Na I, Na II     | 0.782                |
|                                                           | Na I, Na I                  | Na II, Na II    | 0.792                |
|                                                           | Na II, Na II                | Na I, Na I      | 0.357                |
|                                                           | Na II, Na II                | Na I, Na II     | 0.377                |
|                                                           | Na II, Na II                | Na II, Na II    | 0.387                |
|                                                           | Na I, Na II                 | Na I, Na I      | 0.397                |
|                                                           | Na I, Na II                 | Na I, Na II     | 0.476                |
| t- Ca <sub>0.125</sub> Na <sub>2.75</sub> PS <sub>4</sub> | Na I, Na II                 | Na II, Na II    | 0.672                |
|                                                           | Na I                        | Na I            | 0.654                |
|                                                           | Na I                        | Na II           | 0.778                |
|                                                           | Na II                       | Na I            | 0.387                |
| t- Ca <sub>0.25</sub> Na <sub>2.5</sub> PS <sub>4</sub>   | Na II                       | Na II           | 0.397                |
|                                                           | Na I, Na I                  | Na I, Na I      | 0.732                |
|                                                           | Na I, Na I                  | Na I, Na II     | 0.879                |
|                                                           | Na I, Na I                  | Na II, Na II    | 0.891                |
|                                                           | Na II, Na II                | Na I, Na I      | 0.264                |
|                                                           | Na II, Na II                | Na I, Na II     | 0.293                |
|                                                           | Na II, Na II                | Na II, Na II    | 0.323                |
|                                                           | Na I, Na II                 | Na I, Na I      | 0.387                |
|                                                           | Na I, Na II                 | Na I, Na II     | 0.642                |
|                                                           | Na I, Na II                 | Na II, Na II    | 0.666                |

**Table S2.** Calculation of formation energies of Ca and Na vacancies with different concentrations at different sites.

| Composition                                               | Ca <sup>2+</sup> doped site                               | Na vacancy site     | Formation energy(eV) |       |
|-----------------------------------------------------------|-----------------------------------------------------------|---------------------|----------------------|-------|
| c- Ca <sub>0.375</sub> Na <sub>2.25</sub> PS <sub>4</sub> | Na I, Na I, Na I                                          | Na I, Na I, Na I    | 0.733                |       |
|                                                           | Na I, Na I, Na I                                          | Na II, Na I, Na I   | 0.759                |       |
|                                                           | Na I, Na I, Na I                                          | Na I, Na II, Na II  | 0.810                |       |
|                                                           | Na I, Na I, Na I                                          | Na II, Na II, Na II | 0.822                |       |
|                                                           | Na II, Na II, Na II                                       | Na I, Na I, Na I    | 0.472                |       |
|                                                           | Na II, Na II, Na II                                       | Na II, Na I, Na I   | 0.493                |       |
|                                                           | Na II, Na II, Na II                                       | Na I, Na II, Na II  | 0.511                |       |
|                                                           | Na II, Na II, Na II                                       | Na II, Na II, Na II | 0.558                |       |
|                                                           | Na II, Na I, Na I                                         | Na I, Na I, Na I    | 0.673                |       |
|                                                           | Na II, Na I, Na I                                         | Na II, Na I, Na I   | 0.682                |       |
|                                                           | Na II, Na I, Na I                                         | Na I, Na II, Na II  | 0.693                |       |
|                                                           | Na II, Na I, Na I                                         | Na II, Na II, Na II | 0.697                |       |
|                                                           | Na II, Na II, Na I                                        | Na I, Na I, Na I    | 0.654                |       |
|                                                           | Na II, Na II, Na I                                        | Na II, Na I, Na I   | 0.655                |       |
|                                                           | Na II, Na II, Na I                                        | Na I, Na II, Na II  | 0.660                |       |
|                                                           | Na II, Na II, Na I                                        | Na II, Na II, Na II | 0.662                |       |
|                                                           | t- Ca <sub>0.375</sub> Na <sub>2.25</sub> PS <sub>4</sub> | Na I, Na I, Na I    | Na I, Na I, Na I     | 0.765 |
|                                                           |                                                           | Na I, Na I, Na I    | Na II, Na I, Na I    | 0.782 |
| Na I, Na I, Na I                                          |                                                           | Na I, Na II, Na II  | 0.810                |       |
| Na I, Na I, Na I                                          |                                                           | Na II, Na II, Na II | 0.812                |       |
| Na II, Na II, Na II                                       |                                                           | Na I, Na I, Na I    | 0.487                |       |
| Na II, Na II, Na II                                       |                                                           | Na II, Na I, Na I   | 0.529                |       |
| Na II, Na II, Na II                                       |                                                           | Na I, Na II, Na II  | 0.551                |       |
| Na II, Na II, Na II                                       |                                                           | Na II, Na II, Na II | 0.573                |       |
| Na I, Na I, Na II                                         |                                                           | Na I, Na I, Na I    | 0.724                |       |
| Na I, Na I, Na II                                         |                                                           | Na II, Na I, Na I   | 0.734                |       |
| Na I, Na I, Na II                                         |                                                           | Na I, Na II, Na II  | 0.740                |       |
| Na I, Na I, Na II                                         |                                                           | Na II, Na II, Na II | 0.749                |       |
| Na I, Na II, Na II                                        |                                                           | Na I, Na I, Na I    | 0.646                |       |
| Na I, Na II, Na II                                        |                                                           | Na II, Na I, Na I   | 0.654                |       |
| Na I, Na II, Na II                                        |                                                           | Na I, Na II, Na II  | 0.665                |       |
| Na I, Na II, Na II                                        |                                                           | Na II, Na II, Na II | 0.685                |       |

**Table S3.** Calculation of formation energies of Ca and Na vacancies with different concentrations at different sites.

| Composition                                         | Ca <sup>2+</sup> doped site | Na vacancy site            | Formation energy(eV) |
|-----------------------------------------------------|-----------------------------|----------------------------|----------------------|
| c-Ca <sub>0.5</sub> Na <sub>2</sub> PS <sub>4</sub> | Na I, Na I, Na I, Na I      | Na I, Na I, Na I, Na I     | 1.054                |
|                                                     | Na I, Na I, Na I, Na I      | Na II, Na I, Na I, Na I    | 1.067                |
|                                                     | Na I, Na I, Na I, Na I      | Na II, Na II, Na I, Na I   | 1.076                |
|                                                     | Na I, Na I, Na I, Na I      | Na II, Na II, Na II, Na I  | 1.147                |
|                                                     | Na I, Na I, Na I, Na I      | Na II, Na II, Na II, Na II | 1.197                |
|                                                     | Na II, Na II, Na II, Na II  | Na I, Na I, Na I, Na I     | 0.546                |
|                                                     | Na II, Na II, Na II, Na II  | Na II, Na I, Na I, Na I    | 0.547                |
|                                                     | Na II, Na II, Na II, Na II  | Na II, Na II, Na I, Na I   | 0.554                |
|                                                     | Na II, Na II, Na II, Na II  | Na II, Na II, Na II, Na I  | 0.555                |
|                                                     | Na II, Na II, Na II, Na II  | Na II, Na II, Na II, Na II | 0.556                |
|                                                     | Na II, Na I, Na I, Na I     | Na I, Na I, Na I, Na I     | 0.682                |
|                                                     | Na II, Na I, Na I, Na I     | Na II, Na I, Na I, Na I    | 0.687                |
|                                                     | Na II, Na I, Na I, Na I     | Na II, Na II, Na I, Na I   | 0.693                |
|                                                     | Na II, Na I, Na I, Na I     | Na II, Na II, Na II, Na I  | 0.888                |
|                                                     | Na II, Na I, Na I, Na I     | Na II, Na II, Na II, Na II | 0.992                |
|                                                     | Na II, Na II, Na I, Na I    | Na I, Na I, Na I, Na I     | 0.613                |
|                                                     | Na II, Na II, Na I, Na I    | Na II, Na I, Na I, Na I    | 0.662                |
|                                                     | Na II, Na II, Na I, Na I    | Na II, Na II, Na I, Na I   | 0.667                |
|                                                     | Na II, Na II, Na I, Na I    | Na II, Na II, Na II, Na I  | 0.672                |
|                                                     | Na II, Na II, Na I, Na I    | Na II, Na II, Na II, Na II | 0.677                |
|                                                     | Na II, Na II, Na II, Na I   | Na I, Na I, Na I, Na I     | 0.596                |
|                                                     | Na II, Na II, Na II, Na I   | Na II, Na I, Na I, Na I    | 0.597                |
|                                                     | Na II, Na II, Na II, Na I   | Na II, Na II, Na I, Na I   | 0.598                |
|                                                     | Na II, Na II, Na II, Na I   | Na II, Na II, Na II, Na I  | 0.609                |
|                                                     | Na II, Na II, Na II, Na I   | Na II, Na II, Na II, Na II | 0.610                |



**Table S4.** Calculation of formation energies of Ca and Na vacancies with different concentrations at different sites.

| Composition                                            | Ca <sup>2+</sup> doped site | Na vacancy site            | Formation energy(eV) |
|--------------------------------------------------------|-----------------------------|----------------------------|----------------------|
| t- c-Ca <sub>0.5</sub> Na <sub>2</sub> PS <sub>4</sub> | Na I, Na I, Na I, Na I      | Na I, Na I, Na I, Na I     | 0.948                |
|                                                        | Na I, Na I, Na I, Na I      | Na II, Na I, Na I, Na I    | 0.959                |
|                                                        | Na I, Na I, Na I, Na I      | Na II, Na II, Na I, Na I   | 0.968                |
|                                                        | Na I, Na I, Na I, Na I      | Na II, Na II, Na II, Na I  | 1.031                |
|                                                        | Na I, Na I, Na I, Na I      | Na II, Na II, Na II, Na II | 1.077                |
|                                                        | Na II, Na II, Na II, Na II  | Na I, Na I, Na I, Na I     | 0.492                |
|                                                        | Na II, Na II, Na II, Na II  | Na II, Na I, Na I, Na I    | 0.494                |
|                                                        | Na II, Na II, Na II, Na II  | Na II, Na II, Na I, Na I   | 0.498                |
|                                                        | Na II, Na II, Na II, Na II  | Na II, Na II, Na II, Na I  | 0.499                |
|                                                        | Na II, Na II, Na II, Na II  | Na II, Na II, Na II, Na II | 0.537                |
|                                                        | Na II, Na I, Na I, Na I     | Na I, Na I, Na I, Na I     | 0.618                |
|                                                        | Na II, Na I, Na I, Na I     | Na II, Na I, Na I, Na I    | 0.623                |
|                                                        | Na II, Na I, Na I, Na I     | Na II, Na II, Na I, Na I   | 0.799                |
|                                                        | Na II, Na I, Na I, Na I     | Na II, Na II, Na II, Na I  | 0.892                |
|                                                        | Na II, Na I, Na I, Na I     | Na II, Na II, Na II, Na II | 0.893                |
|                                                        | Na II, Na II, Na I, Na I    | Na I, Na I, Na I, Na I     | 0.595                |
|                                                        | Na II, Na II, Na I, Na I    | Na II, Na I, Na I, Na I    | 0.599                |
|                                                        | Na II, Na II, Na I, Na I    | Na II, Na II, Na I, Na I   | 0.604                |
|                                                        | Na II, Na II, Na I, Na I    | Na II, Na II, Na II, Na I  | 0.609                |
|                                                        | Na II, Na II, Na I, Na I    | Na II, Na II, Na II, Na II | 0.613                |
|                                                        | Na II, Na II, Na II, Na I   | Na I, Na I, Na I, Na I     | 0.537                |
|                                                        | Na II, Na II, Na II, Na I   | Na II, Na I, Na I, Na I    | 0.538                |
|                                                        | Na II, Na II, Na II, Na I   | Na II, Na II, Na I, Na I   | 0.548                |
|                                                        | Na II, Na II, Na II, Na I   | Na II, Na II, Na II, Na I  | 0.549                |
|                                                        | Na II, Na II, Na II, Na I   | Na II, Na II, Na II, Na II | 0.551                |

---

**Table S5.** Calculation of B/G values of pure phase and doped phase with different concentration of Ca<sup>2+</sup> based on first-principles.

---

| <b>Composition</b>                                       | <b>B/G</b> |
|----------------------------------------------------------|------------|
| c-Na <sub>3</sub> PS <sub>4</sub>                        | 1.25       |
| c-Ca <sub>0.125</sub> Na <sub>2.75</sub> PS <sub>4</sub> | 1.56       |
| c-Ca <sub>0.25</sub> Na <sub>2.5</sub> PS <sub>4</sub>   | 1.39       |
| c-Ca <sub>0.375</sub> Na <sub>2.25</sub> PS <sub>4</sub> | 1.32       |
| c-Ca <sub>0.5</sub> Na <sub>2</sub> PS <sub>4</sub>      | 1.27       |
| t-Na <sub>3</sub> PS <sub>4</sub>                        | 1.44       |
| t-Ca <sub>0.125</sub> Na <sub>2.75</sub> PS <sub>4</sub> | 1.23       |
| t-Ca <sub>0.25</sub> Na <sub>2.5</sub> PS <sub>4</sub>   | 1.51       |
| t-Ca <sub>0.375</sub> Na <sub>2.25</sub> PS <sub>4</sub> | 1.40       |
| t-Ca <sub>0.5</sub> Na <sub>2</sub> PS <sub>4</sub>      | 1.35       |

---
